# Supplementary material
Source: PubMed Central journal article supplement (PMC10219956)
Supplement: 41746_2023_839_MOESM2_ESM.pdf [file 41746_2023_839_MOESM2_ESM.pdf]

## Supplementary information

Mapping the digital health ecosystem in Africa in the context of endemic infectious and non-communicable diseases: A cross-national analysis of 54 countries

**Supplementary Table1. Comparison of the global versus Africa burden of endemic infectious diseases, 2021.** DR: drug-resistant; MDR: multidrug-resistant; US\$: United States Dollar.

| Infectious disease  | Indicator                                             | Global burden | African share         |
|---------------------|-------------------------------------------------------|---------------|-----------------------|
| <b>HIV</b>          | People living with HIV                                | 38.4 million  | 25.78 million (67.1%) |
|                     | On antiretroviral therapy                             | 28.7 million  | 20.19 million (70.3%) |
|                     | Estimated incidence                                   | 1.5 million   | 874,000 (58.3%)       |
|                     | HIV-related deaths                                    | 650,000       | 425,100 (65.4%)       |
|                     | Pre-treatment prevalence of DR-HIV                    | 156,982       | 18,393 (11.7%)        |
|                     | Nucleoside reverse-transcriptase inhibitor resistance | 5.4%          | 6.1% (113%)           |
|                     | Efavirenz or nevirapine resistance                    | 12.9%         | 15.4% (119.4%)        |
|                     | Atazanavir, darunavir, lopinavir/ritonavir resistance | 0.4%          | 0.3% (75%)            |
|                     | Integrase strand-transfer inhibitor resist.           | 0.6%          | 0.1% (16.7%)          |
|                     | Available annual funding 2021 (US\$)                  | 21.4 billion  | 12.2 billion (57%)    |
| <b>Tuberculosis</b> | Incidence                                             | 9.87 million  | 2.46 million (25%)    |
|                     | Notified                                              | 6,154,338     | 1,405,329 (22.8%)     |
|                     | Mortality                                             | 1,494,000     | 549,000 (36.7%)       |
|                     | HIV-TB incidence                                      | 787,000       | 579,000 (73.6%)       |
|                     | Confirmed MDR/RR-TB                                   | 156,982       | 18,393 (11.7%)        |
|                     | Available annual funding, 2021 (US\$)                 | 4,877,000,000 | 758,770,000 (15.5%)   |
| <b>Malaria</b>      | Incidence                                             | 241 million   | 228 million (94.6%)   |
|                     | Deaths                                                | 627,000       | 602,000 (96%)         |
|                     | Available annual funding, 2021 (US\$)                 | 3.3 billion   | 2.6 billion (79%)     |

**Supplementary Table 2. Co-linearity between countries' mortality attributed to endemic non-communicable diseases.** r: Spearman's correlation; \* P-value <0.05; DM: Diabetes mellitus; CVD: cardiovascular diseases; RD: respiratory diseases; MN: malignant neoplasms; NCD: non-communicable diseases

| Items                  | DM death<br>(n) | CVD death<br>(n) | RD death<br>(n). | MN death<br>(n) | Total NCD death<br>(n) |
|------------------------|-----------------|------------------|------------------|-----------------|------------------------|
| DM death<br>(n)        | 1               |                  |                  |                 |                        |
| CVD death<br>(n)       | .962*           | 1                |                  |                 |                        |
| RD death<br>(n)        | .967*           | .976*            | 1                |                 |                        |
| MN death<br>(n)        | .957*           | .969*            | .957*            | 1               |                        |
| Total NCD death<br>(n) | .974*           | .993*            | .980*            | .983*           | 1                      |

**Supplementary Table 3. Collinearity between countries' burden of endemic infectious diseases.** r: Spearman's correlation; \* *P-value* <0.05; DR: drug-resistant; MDR: multidrug-resistant; pn: population

| Items                           | People living with HIV | AIDS-related deaths | TB Incidence (n) | TB Incidence rate (per 100,000 pn) | TB-related deaths (n) | TB Deaths rate (per 100,000 pn.) | TB Treatment coverage (%) | TB Total cases notified | Lab-confirmed MDR/RR-TB | Treatment success rate (%) | Malaria Cases (n) |
|---------------------------------|------------------------|---------------------|------------------|------------------------------------|-----------------------|----------------------------------|---------------------------|-------------------------|-------------------------|----------------------------|-------------------|
| <b>HIV</b>                      |                        |                     |                  |                                    |                       |                                  |                           |                         |                         |                            |                   |
| People living with HIV          | 1                      |                     |                  |                                    |                       |                                  |                           |                         |                         |                            |                   |
| AIDS-related deaths             | .967*                  | 1                   |                  |                                    |                       |                                  |                           |                         |                         |                            |                   |
| <b>Tuberculosis</b>             |                        |                     |                  |                                    |                       |                                  |                           |                         |                         |                            |                   |
| Incidence (n)                   | .658*                  | .688*               | 1                |                                    |                       |                                  |                           |                         |                         |                            |                   |
| Incidence rate (per 100,000 pn) | .453*                  | .508*               | .473*            | 1                                  |                       |                                  |                           |                         |                         |                            |                   |
| TB-related deaths (n)           | .747*                  | .777*               | .942*            | .571*                              | 1                     |                                  |                           |                         |                         |                            |                   |
| Deaths rate (per 100,000 pn.)   | .499*                  | .532*               | .408*            | .941*                              | .563*                 | 1                                |                           |                         |                         |                            |                   |
| Treatment coverage (%)          | -.023                  | -.056               | -.016            | -.353*                             | -.168                 | -.567*                           | 1                         |                         |                         |                            |                   |
| Total cases notified            | .660*                  | .683*               | .936*            | .360*                              | .911*                 | .286*                            | .133                      | 1                       |                         |                            |                   |
| Lab-confirmed MDR/RR-TB         | .707*                  | .722*               | .882*            | .562*                              | .889*                 | .520*                            | -.034                     | .852*                   | 1                       |                            |                   |
| Treatment success rate (%)      | .089                   | -.003               | .273*            | -.168                              | .180                  | -.223                            | .438*                     | .390*                   | .264                    | 1                          |                   |
| <b>Malaria</b>                  |                        |                     |                  |                                    |                       |                                  |                           |                         |                         |                            |                   |
| Cases (n)                       | .557*                  | .566*               | .593*            | .004                               | .624*                 | -.006                            | .128                      | .591*                   | .531*                   | .214                       | 1                 |

**Supplementary Table 4. Countries in Africa ranked top and least three for digital health ecosystem on endemic non-communicable diseases.** r: rank; n: number of cases; DR Congo: Democratic Republic of Congo; ST and Principe: Sao Tome and Principe; DM: Diabetes mellitus; CVD: cardiovascular diseases; RD: respiratory diseases; MN: malignant neoplasms

|           |               |               |              |               |               |               |
|-----------|---------------|---------------|--------------|---------------|---------------|---------------|
| DM death  | South Africa  | Egypt         | Nigeria      | Gambia        | Comoros       | ST & Principe |
| r, n      | 1<br>24812.5  | 2<br>19197.0  | 3<br>19178.7 | 52<br>364.1   | 53<br>284.1   | 54<br>279.0   |
| CVD death | Egypt         | Nigeria       | Morocco      | Cape Verde    | Comoros       | ST & Principe |
| r, n      | 1<br>177261.2 | 2<br>102867.2 | 3<br>88969.9 | 52<br>969.8   | .53<br>801.4  | 54<br>428.4   |
| RD death  | Nigeria       | DR Congo      | Egypt        | Guinea-Bissau | ST & Principe | Comoros       |
| r, n      | 1<br>15902.0  | 2<br>15714.0  | 3<br>15431.0 | 52<br>355.4   | 53<br>307.9   | 54<br>266.1   |
| MN death  | Egypt         | Nigeria       | South Africa | Gambia        | Comoros       | ST & Principe |
| r, n      | 1<br>60064.4  | 2<br>50652.1  | 3<br>40523.3 | 52<br>581.3   | 53<br>430.2   | 54<br>322.8   |

**Supplementary Table 5: Databases and variables used for measures of disease burdens and the macro-level drivers of digital health in Africa.** TB: tuberculosis; NCD: non-communicable diseases; UN ECA; United Nations Economic Commission for Africa; GDP: Gross domestic product; US\$: United States dollar

| <b>WHO Global Health Observatory data</b>                                                      | <b>World Bank Open Data</b>                               |
|------------------------------------------------------------------------------------------------|-----------------------------------------------------------|
| - HIV: Number of People Living With HIV (Number);                                              | - Mobile Cellular Subscriptions (per 100 people);         |
| - TB Total Incidence (Number);                                                                 | - Individuals Using the Internet (% of the population);   |
| - TB Total Incidence (Rate per 100 000 population);                                            | - Fixed Broadband Subscriptions (per 100 people);         |
| - TB Mortality (Number);                                                                       | - Access to Electricity (% of the population);            |
| - TB Mortality (Rate per 100 000 population);                                                  | - High-Technology Exports (% of manufactured exports);    |
| - TB Treatment Coverage (% notified/estimated incidence);                                      | - Adult literacy rate (%);                                |
| - TB Total Cases Notified (Number);                                                            | - GDP per Capita (US\$);                                  |
| - TB-MDR/RR Laboratory-confirmed cases (Number);                                               | - Population Growth (Annual %); and                       |
| - TB Treatment Success Rate (%);                                                               | - Population Ages 65 and Above (% of Total Population).   |
| - TB Financing from Domestic Sources (%);                                                      |                                                           |
| - Malaria Confirmed Cases (Number)                                                             |                                                           |
| - Diabetes mellitus (DM): Number of Deaths Attributed to DM (Number);                          |                                                           |
| - DM: Prevalence (% of Population Ages 20-79)                                                  |                                                           |
| - Cardiovascular diseases (CVD): Number of Deaths Attributed to CVD (Number);                  |                                                           |
| - Respiratory Diseases (RD): Number of Deaths Attributed to RD (Number);                       |                                                           |
| - Malignant Neoplasm (MN): Number of Deaths Attributed to MN (Number);                         |                                                           |
| - NCDs: Number of Deaths Attributed to the four NCDs in Total (Number)                         |                                                           |
| <b>Joint United Nations Programme on HIV/AIDS</b>                                              | <b>UN ECA, Africa United Nations Data for Development</b> |
| - Total number of PWH                                                                          | - Trends in GDP per Capita                                |
| - Total number of individuals on ART                                                           | - Trends in SDG 3                                         |
| - Estimated incidence of HIV infections                                                        |                                                           |
| - HIV-related deaths                                                                           |                                                           |
| - Pre-treatment prevalence of Drug Resistant-HIV                                               |                                                           |
| - Percentage of individuals with nucleoside reverse-transcriptase inhibitor (NNRTI) resistance |                                                           |
| - Percentage of individuals with efavirenz or nevirapine resistance                            |                                                           |
| - Percentage of individuals with atazanavir, darunavir, lopinavir/ritonavir resistance         |                                                           |
| - Percentage of individuals with integrase strand-transfer inhibitor resistance                |                                                           |
| - Available annual funding for HIV in 2021 (US\$)                                              |                                                           |

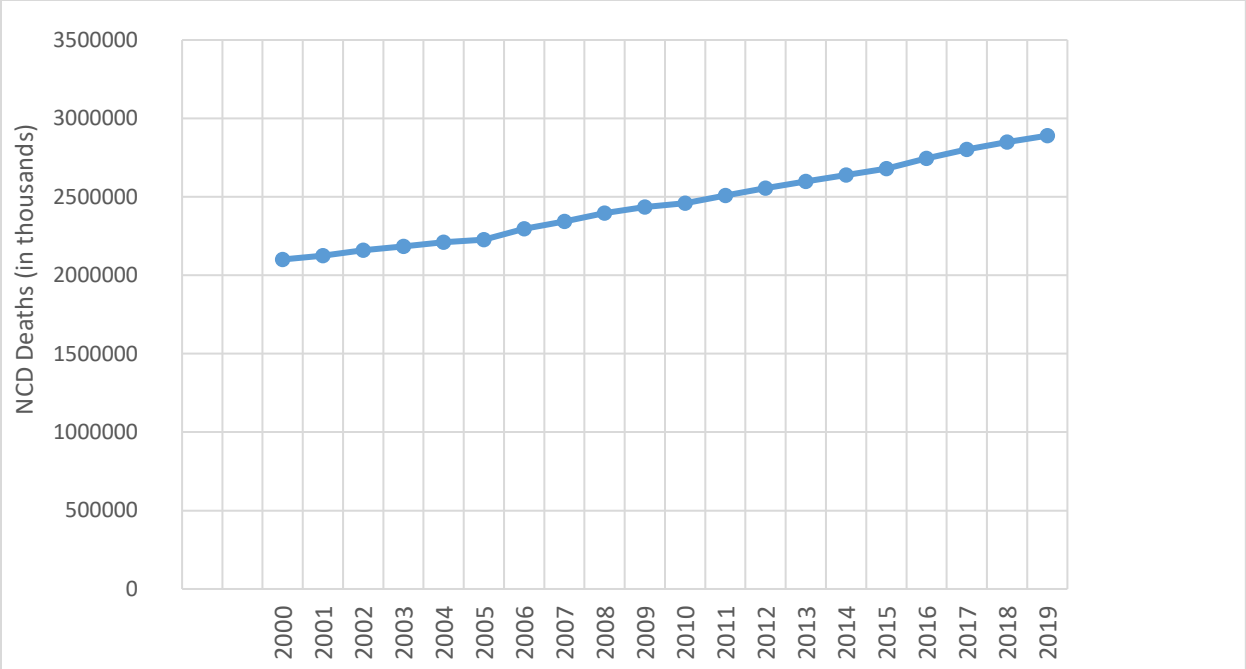

**Supplementary Fig. 1: NCD Deaths in Africa, 2000 – 2019.** Trends in the year 2000 to 2019 of deaths attributed to endemic non-communicable diseases in Africa
